# Supplementary material
Source: PubMed Central journal article supplement (PMC2770750)
Supplement: 00226.2009_1.pdf [file 00226.2009_1.pdf]

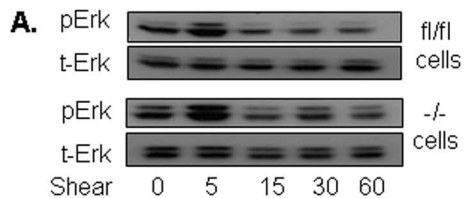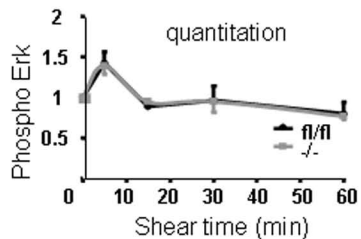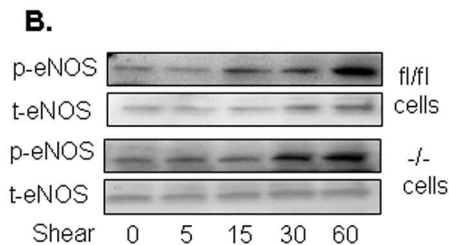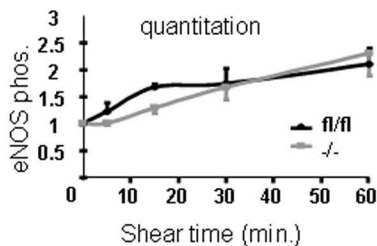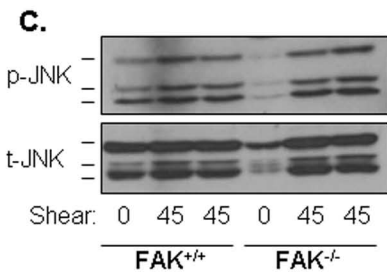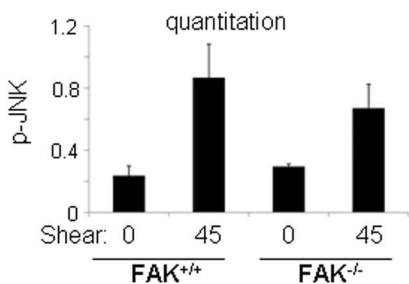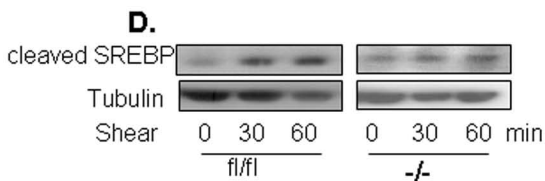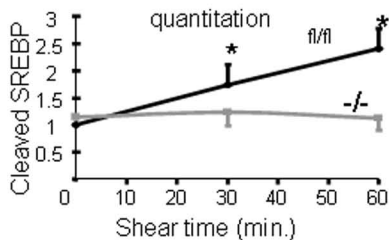

**Supplemental Figure 1.** SREBP cleavage, Erk, JNK and eNOS activation by flow.

Control FAK<sup>fl/fl</sup> (fl/fl) and FAK<sup>-/-</sup> cells were exposed to 24 dynes/cm<sup>2</sup> laminar shear stress (LSS), lysed and analyzed by Western blotting. (A) Erk activation was measured with phospho-specific antibody (Thr 202/Tyr 204) (n=3).

(B) eNOS activation was analyzed using a phospho-specific antibody (Ser 1179) (n=4).

(C) JNK activation was analyzed using a phospho-specific antibody (Thr183/Tyr185) (n=3).

(D) SREBP cleavage was analyzed by detecting mature SREBP (68kDa) (n=4). Bands were quantified by densitometry and normalized to total protein levels. Graphs show the fold increase compared to static conditions. Values are means  $\pm$  SEM. Asterisk \*, p<0.05.
